# Supplementary material for: AAg2PS4(A = K, Na/K): the first-type of noncentrosymmetric alkali metal Ag-based thiophosphates exhibiting excellent second-order nonlinear optical performances
Source: Royal Society of Chemistry journal article supplement (doi:10.1039/d2qi01292h), 2022-01-01
Supplement: d2qi01292h1.pdf [file d2qi01292h1.pdf]

## ***Supporting Information***

### **A<sub>2</sub>Ag<sub>2</sub>PS<sub>4</sub> (A = K, Na/K): the first-type of noncentrosymmetric alkali metal Ag-based thiophosphates exhibiting excellent second-order nonlinear optical performances**

Wenfeng Zhou,<sup>a</sup> Bingxuan Li,<sup>b</sup> Wenlong Liu,<sup>a</sup> and Sheng-Ping Guo\*<sup>a</sup>

<sup>a</sup> *School of Chemistry and Chemical Engineering, Yangzhou University, Yangzhou, Jiangsu 225002, P. R. China*

<sup>b</sup> *Key Laboratory of Optoelectronic Materials Chemistry and Physics, Fujian Institute of Research on the Structure of Matter, Chinese Academy of Sciences, Fuzhou, Fujian 350002, China*

*Corresponding author: [spguo@yzu.edu.cn](mailto:spguo@yzu.edu.cn)*

## Supplementary Information Index

### Tables and Figures

**Table S1.** Crystal data and structure refinement parameters for **1** and **2**.

**Table S2.** Atomic coordinates ( $\times 10^4$ ) and equivalent isotropic displacement parameters ( $\text{\AA}^2 \times 10^3$ ) for **1** and **2**.  $U_{\text{eq}}$  is defined as 1/3 of the trace of the orthogonalized  $U_{ij}$  tensor.

**Table S3.** Bond lengths ( $\text{\AA}$ ) for **1**.

**Table S4.** The EDS results of **1** and **2**.

**Table S5.** Bond valence sums **1** and **2**.

**Table S6.** The calculated dipole moment and distortion ( $\sigma_{\theta(\text{tet})}^2$ ) of single  $\text{AgS}_4$  tetrahedron among **1** and the known Ag-based thiophosphates.

**Table S7.** The NLO data of known NLO-active thiophosphates with 3D framework.

**Table S8.** The measured birefringence of **2** at the wavelength of 546.1 nm with polarizing microscope.

**Fig. S1.** Photographs of the crystals for **1** and **2**.

**Fig. S2.** The EDS images for single crystals of **1** and **2**.

**Fig. S3.**  $\text{AgS}_4$  tetrahedra in (a) **1**, (b)  $\text{Ag}_3\text{PS}_4$ , (c)  $\text{AgZnPS}_4$ , (d)  $\text{AgHgPS}_4$ , (e)  $\text{AgHg}_3\text{PS}_6$ , and (f)  $\text{AgCd}_3\text{PS}_6$ .

**Fig. S4.** Structural evolution from (a) AGS to (b) **1**.

**Fig. S5.** Tauc plots of **1** and **2**.  $n = 2$  (red and blue lines): direct band gap;  $n = 1/2$  (green line): indirect band gap.

**Fig. S6.** FT-IR spectra of for **1** and **2**.

**Fig. S7.** TGA-DSC curves for **1** and **2**.

**Fig. S8.** The calculated real parts (a and b) and imaginary parts (b and d) of optical dielectric functions for **1** and **2**.

**Fig. S9.** The frequency-dependent birefringence  $\Delta n$  of (a) **1** and (b) **2**.

**Fig. S10.** Photograph of **2** for the measurement of birefringence.

**Table S1.** Crystal data and structure refinement parameters for **1** and **2**.

| Empirical formula                              | KAg <sub>2</sub> PS <sub>4</sub> ( <b>1</b> )             | (Na <sub>0.30</sub> K <sub>0.70</sub> )Ag <sub>2</sub> PS <sub>4</sub> ( <b>2</b> ) |
|------------------------------------------------|-----------------------------------------------------------|-------------------------------------------------------------------------------------|
| Formula weight                                 | 414.05                                                    | 409.30                                                                              |
| Temperature/K                                  | 293(2)                                                    | 293(2)                                                                              |
| Crystal system                                 | Tetragonal                                                | Tetragonal                                                                          |
| Space group                                    | $I\bar{A}2m$                                              | $I\bar{A}2m$                                                                        |
| <i>a</i> /Å                                    | 6.5985(3)                                                 | 6.5992(3)                                                                           |
| <i>c</i> /Å                                    | 8.1549(9)                                                 | 8.1499(6)                                                                           |
| <i>V</i> /Å <sup>3</sup>                       | 355.07(5)                                                 | 354.92(5)                                                                           |
| <i>Z</i>                                       | 2                                                         | 2                                                                                   |
| <i>D</i> <sub>calc</sub> g/cm <sup>3</sup>     | 3.873                                                     | 3.830                                                                               |
| $\mu$ /mm <sup>-1</sup>                        | 7.383                                                     | 7.231                                                                               |
| F(000)                                         | 384.0                                                     | 379.0                                                                               |
| 2 $\theta$ range for data collection/ $^\circ$ | 7.994 to 54.984                                           | 7.946 to 60.264                                                                     |
| Index ranges                                   | -8 ≤ <i>h</i> ≤ 5, -8 ≤ <i>k</i> ≤ 7, -10 ≤ <i>l</i> ≤ 10 | -9 ≤ <i>h</i> ≤ 6, -6 ≤ <i>k</i> ≤ 9, -11 ≤ <i>l</i> ≤ 11                           |
| Reflections collected                          | 852                                                       | 932                                                                                 |
| Independent reflections                        | 220 [R <sub>int</sub> = 0.0230, R <sub>σ</sub> = 0.0220]  | 280 [R <sub>int</sub> = 0.02301, R <sub>σ</sub> = 0.0227]                           |
| Data/restraints/parameters                     | 220/0/14                                                  | 280/0/15                                                                            |
| Goodness-of-fit on F <sup>2</sup>              | 1.065                                                     | 1.058                                                                               |
| Flack parameter                                | 0.04 (3)                                                  | 0.00 (3)                                                                            |
| Final R indexes [ <i>I</i> ≥ 2σ ( <i>I</i> )]  | R1 = 0.0238, wR2 = 0.0666                                 | R1 = 0.0223, wR2 = 0.0699                                                           |
| Final R indexes [all data]                     | R1 = 0.0241, wR2 = 0.0669                                 | R1 = 0.0225, wR2 = 0.0700                                                           |
| Largest diff. peak/hole/e Å <sup>-3</sup>      | 0.79/-0.67                                                | 0.50/-0.68                                                                          |

$${}^a R1 = \frac{\sum |F_o| - \sum |F_c|}{\sum |F_o|}, {}^b wR2 = \frac{[\sum w(F_o^2 - F_c^2)^2]}{[\sum w(F_o^2)^2]}^{1/2}.$$

**Table S2.** Atomic coordinates ( $\times 10^4$ ) and equivalent isotropic displacement parameters ( $\text{\AA}^2 \times 10^3$ ) for **1** and **2**.  $U_{eq}$  is defined as 1/3 of the trace of the orthogonalized  $U_{ij}$  tensor.

| Atom     | Wyckoff site | $x$        | $y$        | $z$        | $U_{eq}$ |
|----------|--------------|------------|------------|------------|----------|
| <b>1</b> |              |            |            |            |          |
| K        | $2a$         | 5000       | 5000       | 5000       | 25.9(8)  |
| Ag       | $4d$         | 0          | 5000       | 2500       | 40.8(6)  |
| P        | $2b$         | 0          | 10000      | 5000       | 8.9(7)   |
| S        | $8i$         | 1819(2)    | 8181(2)    | 3602(2)    | 18.1(6)  |
| <b>2</b> |              |            |            |            |          |
| Na/K     | $2a$         | 5000       | 5000       | 5000       | 27.7(16) |
| Ag       | $4d$         | 5000       | 10000      | 7500       | 39.6(4)  |
| P        | $2b$         | 0          | 10000      | 5000       | 11.4(5)  |
| S        | $8i$         | 1822.9(18) | 8177.1(18) | 6393.1(18) | 21.5(5)  |

**Table S3.** Bond lengths ( $\text{\AA}$ ) for **1**.

| Bond       | Length/ $\text{\AA}$ | Bond            | Length/ $\text{\AA}$ |
|------------|----------------------|-----------------|----------------------|
| <b>1</b>   |                      | <b>2</b>        |                      |
| K(1)–S(1)  | $3.180(2) \times 4$  | Na(1)/K(1)–S(1) | $3.175(2) \times 4$  |
| Ag(1)–S(1) | $2.580(8) \times 4$  | Ag(1)–S(1)      | $2.580(6) \times 4$  |
| P(1)–S(1)  | $2.044(2) \times 4$  | P(1)–S(1)       | $2.045(2) \times 4$  |

**Table S4.** The EDS results of **1** and **2**.

| Molar ratio | Na   | K     | Ag    | P     | S     |
|-------------|------|-------|-------|-------|-------|
| <b>1</b>    | –    | 10.15 | 21.21 | 15.69 | 52.95 |
| <b>2</b>    | 3.89 | 9.18  | 20.79 | 13.82 | 52.33 |

**Table S5.** Bond valence sums **1** and **2**.

| Atoms    | BVS   | Atoms    | BVS   |
|----------|-------|----------|-------|
| <b>1</b> |       | <b>2</b> |       |
| K        | 0.90  | Na/K     | 0.73  |
| Ag       | 1.15  | Ag       | 1.15  |
| P        | 4.89  | P        | 4.90  |
| S        | -2.02 | S        | -1.95 |

**Table S6.** The calculated dipole moment and distortion ( $\sigma_{\theta(\text{tet})}^2$ ) of single  $\text{AgS}_4$  tetrahedron among **1** and the known Ag-based thiophosphates.

| Compound                 | Magnitude (deby) | $\sigma_{\theta(\text{tet})}^2$ | Compound                   | magnitude (deby) | $\sigma_{\theta(\text{tet})}^2$ |
|--------------------------|------------------|---------------------------------|----------------------------|------------------|---------------------------------|
| <b>1</b>                 | 13.43            | 474.9                           | $\text{AgHgPS}_4$          | 9.29             | 14.85                           |
| $\text{Ag}_3\text{PS}_4$ | 4.76             | 20.54                           | $\text{AgHg}_3\text{PS}_6$ | 8.36             | 73.42                           |
| $\text{AgZnPS}_4$        | 7.40             | 18.23                           | $\text{AgCd}_3\text{PS}_6$ | 4.28             | 159.4                           |

**Note:**  $\sigma_{\theta(\text{tet})}^2 = \sum_{i=1}^6 (\theta_t - 109.47^\circ) / 5$ , where  $\sigma_{\theta(\text{tet})}^2$  is used to describe the distortion and  $\theta_t$  is the bond angle.

**Table S7.** The NLO data of known NLO-active thiophosphates with 3D framework.

| Compound                                                               | Space group                      | Structural units                                           | Band gap (eV) | SHG        | LIDT       | PM/NPM | Ref.      |
|------------------------------------------------------------------------|----------------------------------|------------------------------------------------------------|---------------|------------|------------|--------|-----------|
| Ag <sub>3</sub> PS <sub>4</sub>                                        | <i>Pmn2</i> <sub>1</sub>         | AgS <sub>4</sub> , PS <sub>4</sub>                         | 2.43          | 1.3 × AGS  | –          | PM     | [1]       |
| Cu <sub>3</sub> PS <sub>4</sub>                                        | <i>Pmn2</i> <sub>1</sub>         | CuS <sub>4</sub> , PS <sub>4</sub>                         | 2.25          | 0.5 × AGS  | –          | NPM    | [1]       |
| Ag <sub>1.5</sub> Cu <sub>1.5</sub> PS <sub>4</sub>                    | <i>Pmn2</i> <sub>1</sub>         | (Ag/Cu)S <sub>4</sub> , PS <sub>4</sub>                    | 2.37          | 0.8 × AGS  | –          | PM     | [1]       |
| Eu <sub>2</sub> P <sub>2</sub> S <sub>6</sub>                          | <i>Pn</i>                        | EuS <sub>8</sub> , P <sub>2</sub> S <sub>6</sub>           | 2.54          | 0.9 × AGS  | 3.4 × AGS  | PM     | [2]       |
| Ba <sub>2</sub> P <sub>2</sub> S <sub>6</sub>                          | <i>Pn</i>                        | BaS <sub>6</sub> , P <sub>2</sub> S <sub>6</sub>           | 4.3           | 1.7 × AGS  | 5.5 × AGS  | NPM    | [3]       |
| Pb <sub>2</sub> P <sub>2</sub> S <sub>6</sub>                          | <i>Pn</i>                        | PbS <sub>6</sub> , P <sub>2</sub> S <sub>6</sub>           | 2.6           | 1.4 × AGS  | 2.5 × AGS  | PM     | [3]       |
| Zn <sub>3</sub> P <sub>2</sub> S <sub>8</sub>                          | <i>P</i> <sup>4</sup> <i>n2</i>  | ZnS <sub>4</sub> , PS <sub>4</sub>                         | 3.12          | 2.6 × AGS  | –          | PM     | [4]       |
| Hg <sub>3</sub> P <sub>2</sub> S <sub>8</sub>                          | <i>Aea2</i>                      | HgS <sub>4</sub> , PS <sub>4</sub>                         | 2.77          | 4.2 × AGS  | 4 × AGS    | PM     | [5]       |
| SnPS <sub>3</sub>                                                      | <i>Pn</i>                        | SnS <sub>8</sub> , P <sub>2</sub> S <sub>6</sub>           | 2.35          | 1.1 × AGS  | 6.9 × AGS  | PM     | [6]       |
| KAg <sub>2</sub> PS <sub>4</sub>                                       | <i>I</i> <sup>4</sup> <i>A2m</i> | AgS <sub>4</sub> , PS <sub>4</sub>                         | 2.92          | 1.40 × AGS | 3.49 × AGS | PM     | This work |
| (Na <sub>0.30</sub> K <sub>0.70</sub> )Ag <sub>2</sub> PS <sub>4</sub> | <i>I</i> <sup>4</sup> <i>A2m</i> | AgS <sub>4</sub> , PS <sub>4</sub>                         | 2.89          | 1.65 × AGS | 2.77 × AGS | PM     | This work |
| AgZnPS <sub>4</sub>                                                    | <i>Pna2</i> <sub>1</sub>         | AgS <sub>4</sub> , ZnS <sub>4</sub> , PS <sub>4</sub>      | 2.76          | 1.8 × AGS  | –          | PM     | [7]       |
| CuZnPS <sub>4</sub>                                                    | <i>I</i> <sup>4</sup> <i>A2m</i> | CuS <sub>4</sub> , ZnS <sub>4</sub> , PS <sub>4</sub>      | 3.00          | 3 × AGS    | 6 × AGS    | PM     | [8]       |
| LiZnPS <sub>4</sub>                                                    | <i>I</i> <sup>4</sup>            | LiS <sub>4</sub> , ZnS <sub>4</sub> , PS <sub>4</sub>      | 3.38          | 0.8 × AGS  | –          | PM     | [7]       |
| Cu <sub>5</sub> Zn <sub>0.5</sub> P <sub>2</sub> S <sub>8</sub>        | <i>Pmn2</i> <sub>1</sub>         | (Cu/Zn)S <sub>4</sub> , ZnS <sub>4</sub> , PS <sub>4</sub> | 2.31          | 0.3 × AGS  | 3.2 × AGS  | PM     | [9]       |
| AgHgPS <sub>4</sub>                                                    | <i>Pn</i>                        | AgS <sub>4</sub> , HgS <sub>4</sub> , PS <sub>4</sub>      | 2.63          | 5.09 × AGS | –          | PM     | [10]      |
| CuHgPS <sub>4</sub>                                                    | <i>Pna2</i> <sub>1</sub>         | CuS <sub>4</sub> , HgS <sub>4</sub> , PS <sub>4</sub>      | 2.03          | 6.5 × AGS  | 4.2 × AGS  | PM     | [11]      |
| NaHgPS <sub>4</sub>                                                    | <i>P</i> <sup>4</sup> <i>n2</i>  | HgS <sub>4</sub> , PS <sub>4</sub>                         | 2.78          | 3.14 × AGS | –          | PM     | [12]      |
| KHgPS <sub>4</sub>                                                     | <i>Pnn2</i>                      | HgS <sub>4</sub> , PS <sub>4</sub>                         | 2.90          | 4.15 × AGS | –          | PM     | [12]      |
| AgHg <sub>3</sub> PS <sub>6</sub>                                      | <i>Cc</i>                        | AgS <sub>4</sub> , HgS <sub>4</sub> , PS <sub>4</sub>      | 1.85          | 0.5 × AGS  | –          | NPM    | [13]      |
| Cu <sub>5</sub> Hg <sub>0.5</sub> P <sub>2</sub> S <sub>8</sub>        | <i>Pmn2</i> <sub>1</sub>         | CuS <sub>4</sub> , HgS <sub>4</sub> , PS <sub>4</sub>      | 2.12          | 0.8 × AGS  | –          | PM     | [13]      |
| AgCd <sub>3</sub> PS <sub>6</sub>                                      | <i>Cc</i>                        | AgS <sub>4</sub> , CdS <sub>4</sub> , PS <sub>4</sub>      | 2.56          | 0.45 × AGS | –          | –      | [14]      |
| CuCd <sub>3</sub> PS <sub>6</sub>                                      | <i>Cc</i>                        | CuS <sub>4</sub> , CdS <sub>4</sub> , PS <sub>4</sub>      | 2.24          | 0.9 × AGS  | 4.1 × AGS  | NPM    | [15]      |
| LiCd <sub>3</sub> PS <sub>6</sub>                                      | <i>Cc</i>                        | LiS <sub>4</sub> , CdS <sub>4</sub> , PS <sub>4</sub>      | 2.97          | 0.8 × AGS  | 5.5 × AGS  | PM     | [16]      |
| AgGa <sub>2</sub> PS <sub>6</sub>                                      | <i>Cc</i>                        | AgS <sub>3</sub> , GaS <sub>4</sub> , PS <sub>4</sub>      | 2.75          | 1 × AGS    | 5.1 × AGS  | PM     | [17]      |
| LiGa <sub>2</sub> PS <sub>6</sub>                                      | <i>Cc</i>                        | LiS <sub>4</sub> , GaS <sub>4</sub> , PS <sub>4</sub>      | 3.15          | 0.5 × AGS  | 10.4 × AGS | –      | [16]      |

|                                                |                          |                                                                                      |      |            |            |    |      |
|------------------------------------------------|--------------------------|--------------------------------------------------------------------------------------|------|------------|------------|----|------|
| KSbP <sub>2</sub> S <sub>6</sub>               | <i>Pna2</i> <sub>1</sub> | KS <sub>9</sub> , SbS <sub>7</sub> , P <sub>2</sub> S <sub>6</sub>                   | 2.9  | 2.2 × AGS  | 3 × AGS    | PM | [18] |
| KBiP <sub>2</sub> S <sub>6</sub>               | <i>Pna2</i> <sub>1</sub> | KS <sub>9</sub> , BiS <sub>7</sub> , P <sub>2</sub> S <sub>6</sub>                   | 2.3  | 1.8 × AGS  | 3 × AGS    | PM | [18] |
| K <sub>2</sub> BaP <sub>2</sub> S <sub>6</sub> | <i>Pna2</i> <sub>1</sub> | KS <sub>7</sub> ,KS <sub>8</sub> , BaS <sub>10</sub> , P <sub>2</sub> S <sub>6</sub> | 4.1  | 2.1 × AGS  | 8 × AGS    | PM | [18] |
| RbBiP <sub>2</sub> S <sub>6</sub>              | <i>P2</i> <sub>1</sub>   | BiS <sub>7</sub> , P <sub>2</sub> S <sub>6</sub>                                     | 2.10 | 11.9 × AGS | 11.3 × AGS | PM | [19] |

**Table S8.** The measured birefringence of **2** at the wavelength of 546.1 nm with polarizing microscope.

| Crystal  | Retardation ( $\Delta R, \mu\text{m}$ ) | Thickness ( $\mu\text{m}$ ) | Birefringence ( $\Delta n$ ) |
|----------|-----------------------------------------|-----------------------------|------------------------------|
| <b>2</b> | 1.618                                   | 6.7                         | 0.24                         |

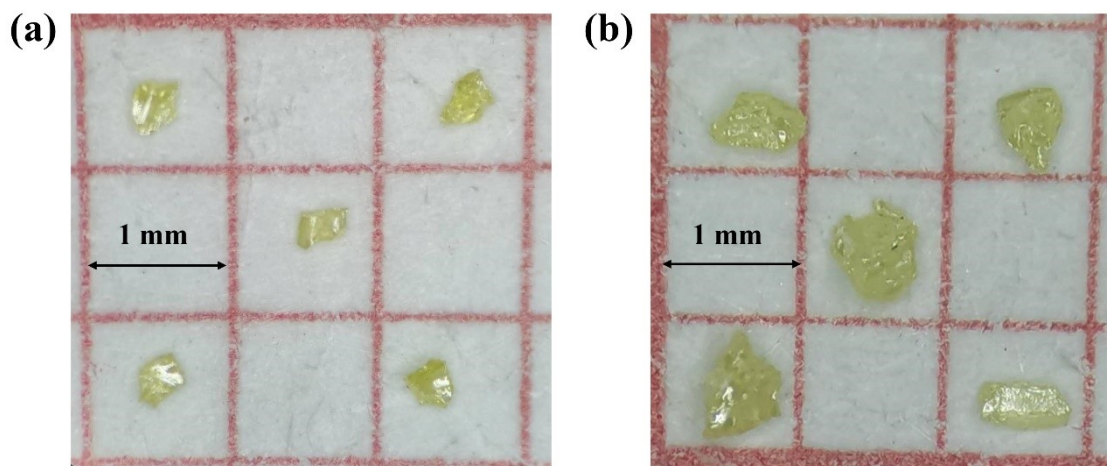

Fig. S1. Photographs of the crystals for (a) 1 and (b) 2.

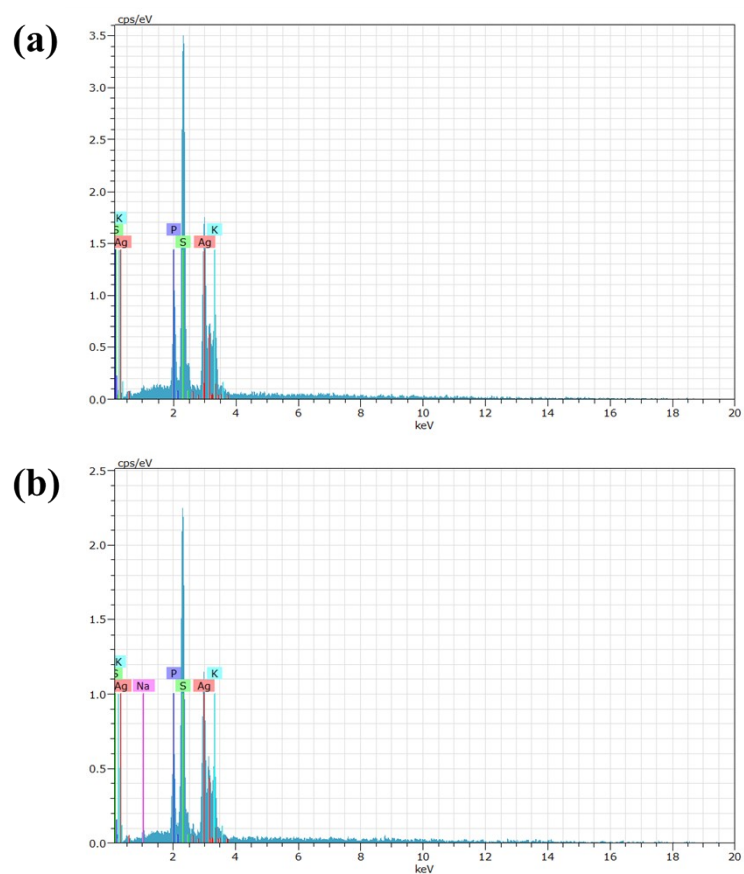

Fig. S2. The EDS images for single crystals of (a) 1 and (b) 2.



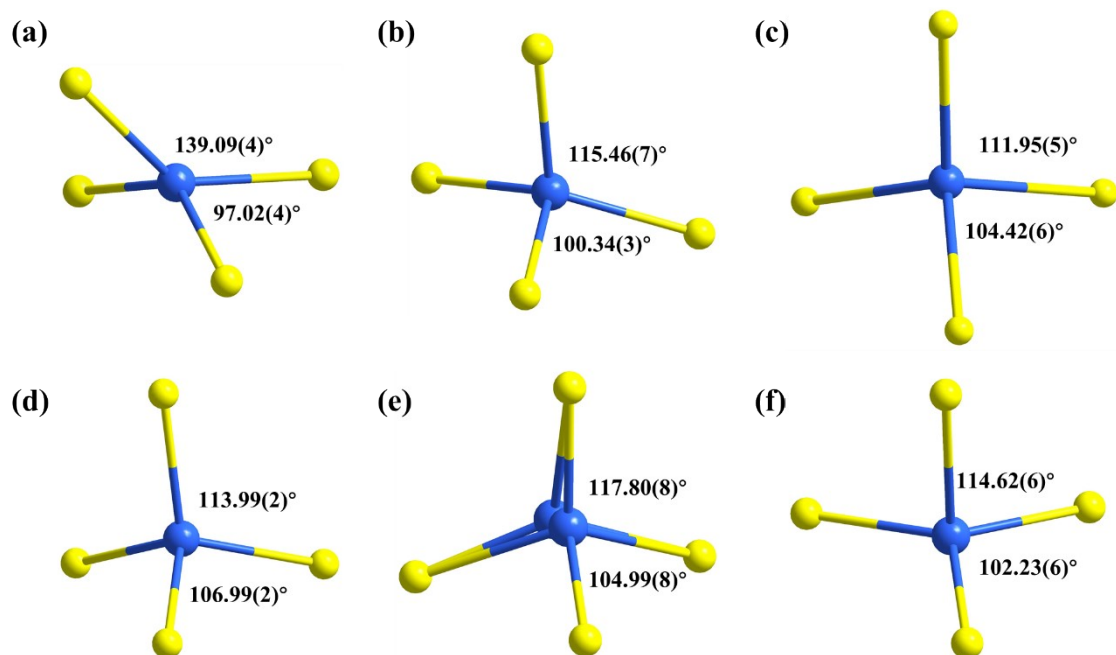

**Fig. S3.**  $\text{AgS}_4$  tetrahedra in (a) **1**, (b)  $\text{Ag}_3\text{PS}_4$ , (c)  $\text{AgZnPS}_4$ , (d)  $\text{AgHgPS}_4$ , (e)  $\text{AgHg}_3\text{PS}_6$ , and (f)  $\text{AgCd}_3\text{PS}_6$ .

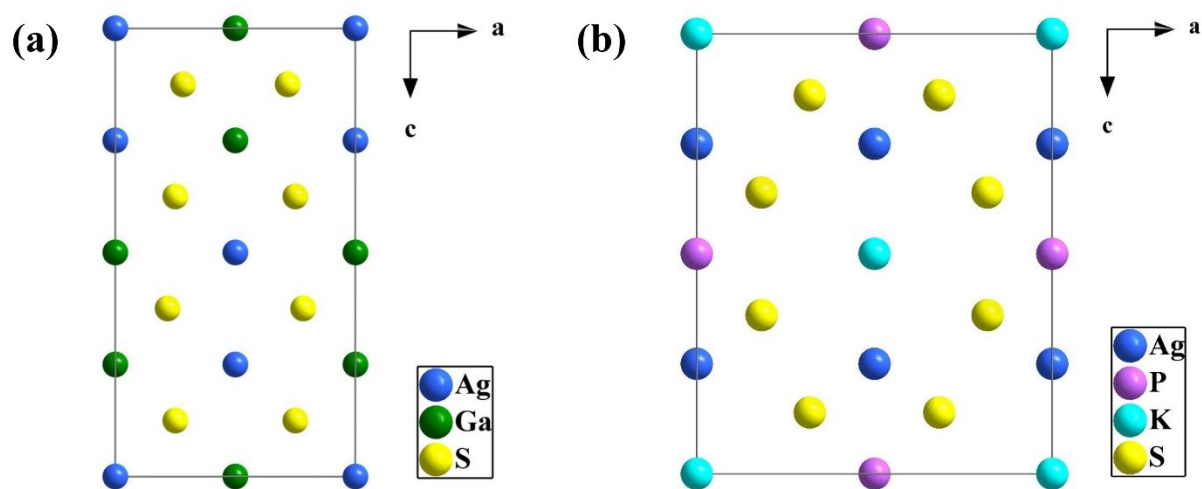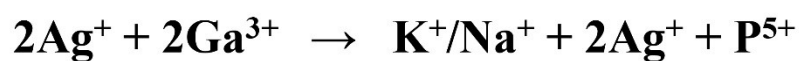

**Fig. S4.** Structural evolution from (a) AGS to (b) **1**.

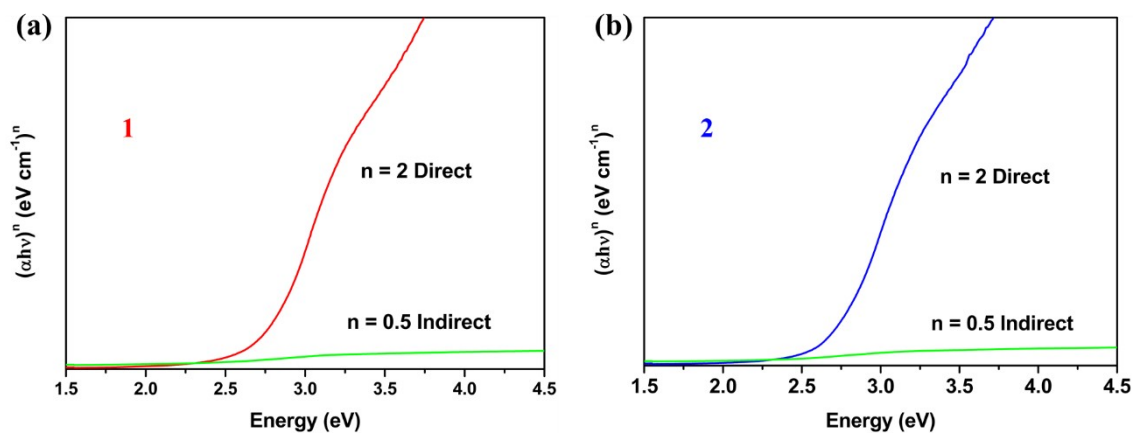

**Fig. S5.** Tauc plots of **1** and **2**.  $n = 2$  (red and blue lines): direct band gap;  $n = 1/2$  (green lines): indirect band gap.

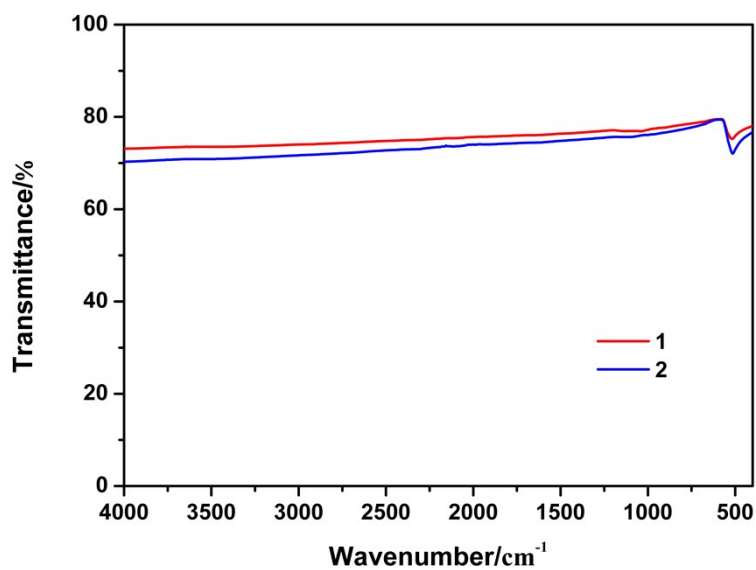

**Fig. S6.** FT-IR spectra for **1** and **2**.

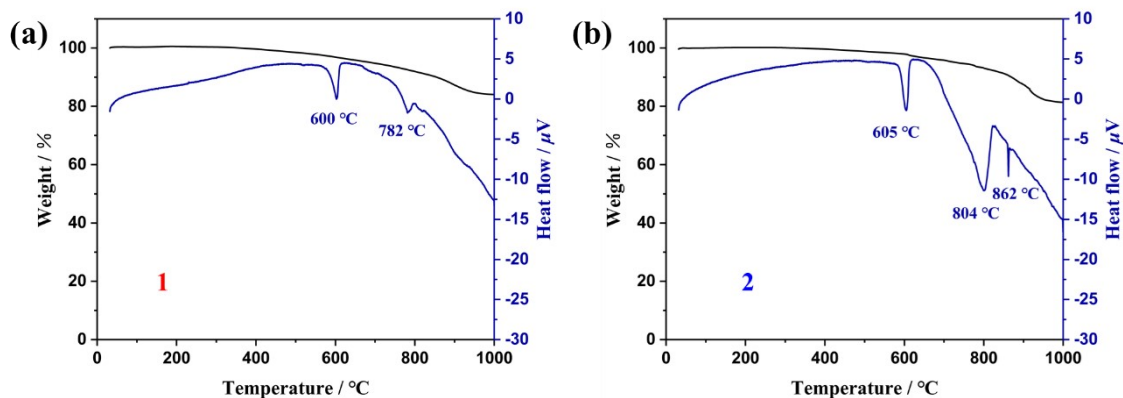

Fig. S7. TGA-DSC curves for 1 and 2.

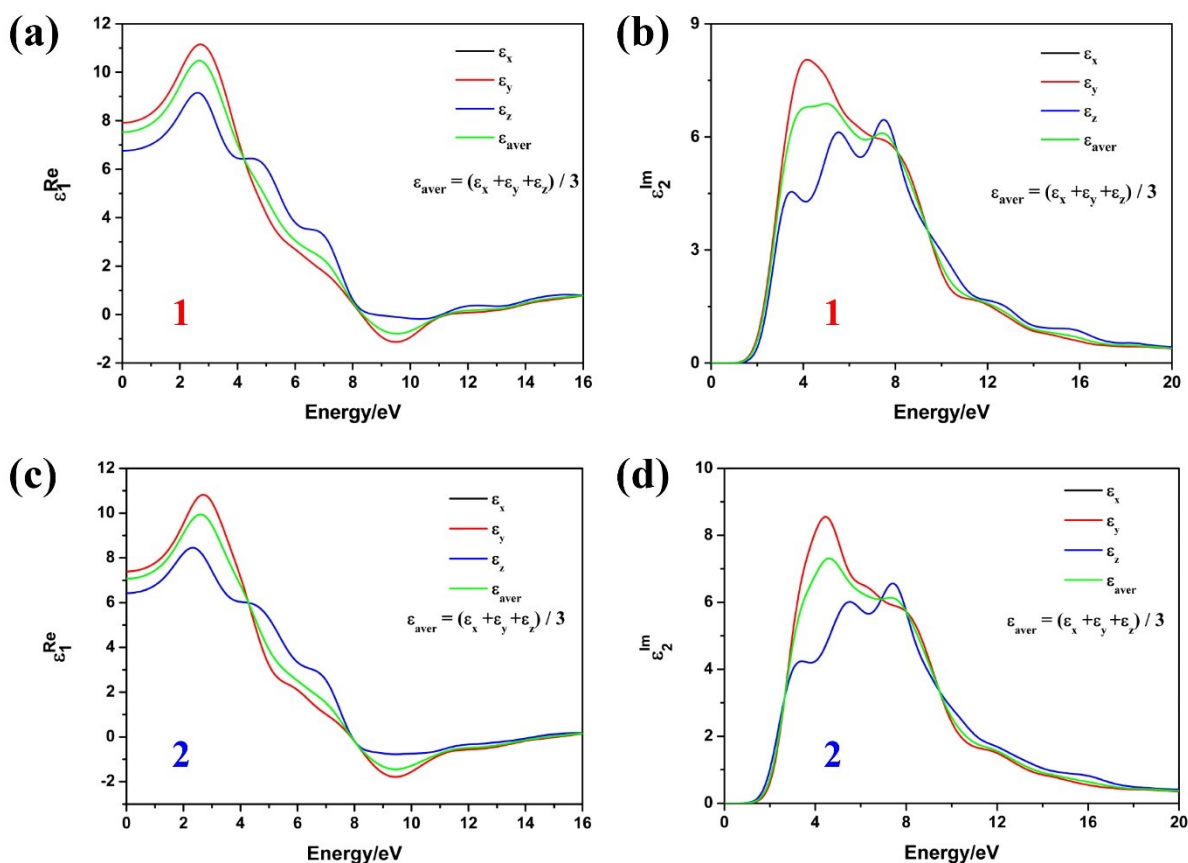

Fig. S8. The calculated real parts (a and c) and imaginary parts (b and d) of optical dielectric functions for 1 and 2.

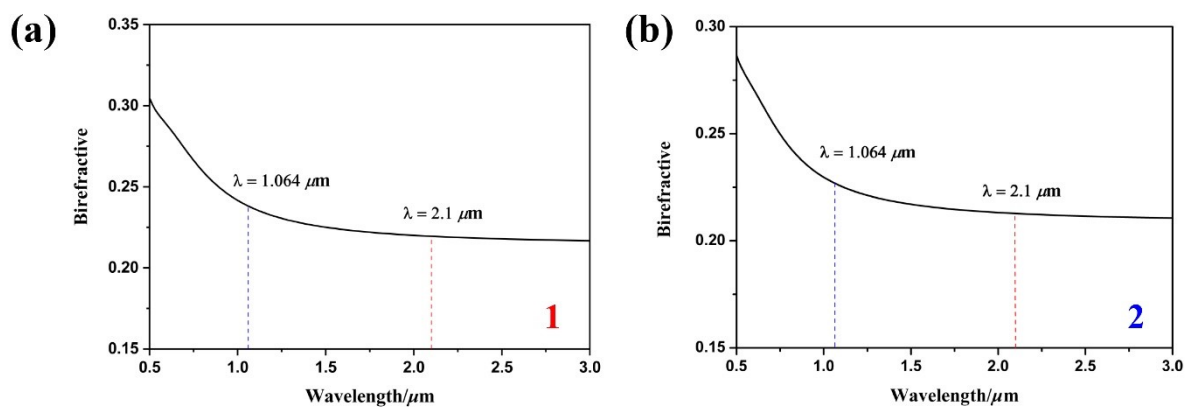

Fig. S9. The frequency-dependent birefringence  $\Delta n$  of (a) 1 and (b) 2.

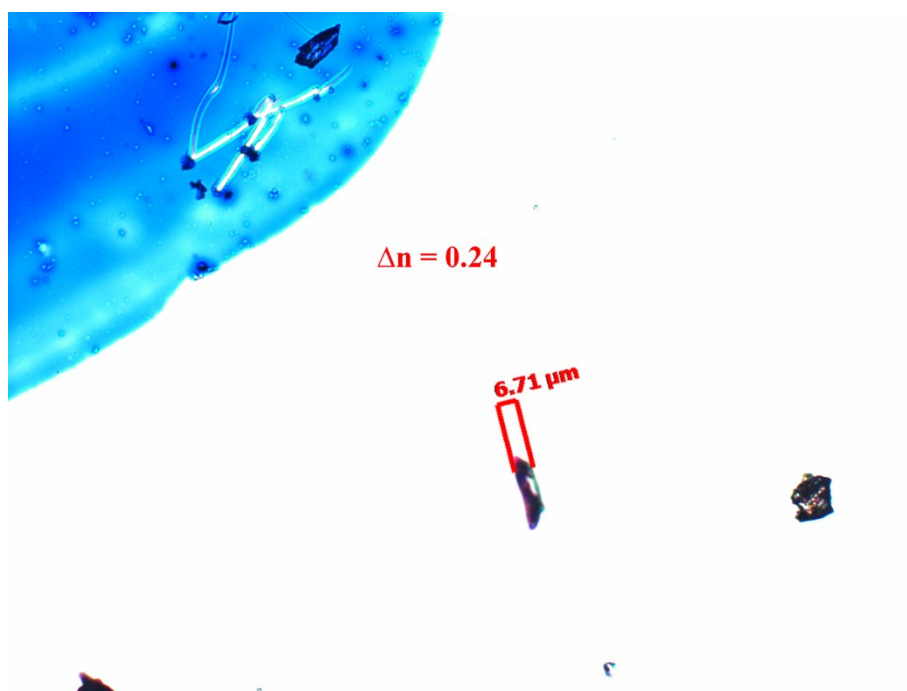

Fig. S10. Photograph of 2 for the birefringence measurement.

## REFERENCES

1. Y. Yang, B. B. Zhang, X. W. Wu and K. Wu, A Series of  $M_3PS_4$  ( $M = Ag, Cu$  and  $Ag/Cu$ ) Thiophosphates with Diamond-Like Structures Exhibiting Large Second Harmonic Generation Responses and Moderate Ion Conductivities, *Dalton Trans.*, 2021, **50**, 4129–4132.
2. X. Huang, S. H. Yang, X. H. Li, W. L. Liu and S. P. Guo,  $Eu_2P_2S_6$ : The First Rare-Earth Chalcogenophosphate Exhibiting Large Second-Harmonic Generation Response and High Laser-Induced Damage Threshold, *Angew. Chem. Int. Ed.*, 2022, e202206791.
3. B. H. Ji, A. Sarkar, K. Wu, A. Swindle and J. Wang,  $A_2P_2S_6$  ( $A = Ba$  and  $Pb$ ): A Good Platform to Study the Polymorph Effect and Lone Pair Effect to Form an Acentric Structure, *Dalton Trans.*, 2022, **51**, 4522–4531.
4. Z. Li, X. X. Jiang, M. L. Zhou, Y. W. Guo, X. Y. Luo, Y. C. Wu, Z. S. Lin and J. Y. Yao,  $Zn_3P_2S_8$ : A Promising Infrared Nonlinear-Optical Material with Excellent Overall Properties, *Inorg. Chem.*, 2018, **57**, 10503–10506.
5. W. H. Xing, F. Liang, C. L. Tang, E. Uykur, Z. S. Lin, J. Y. Yao, W. L. Yin and B. Kang, Highly Distorted  $[HgS_4]$  Motif-Driven Structural Symmetry Degradation and Strengthened Second-Harmonic Generation Response in the Defect Diamond-Like Chalcogenide  $Hg_3P_2S_8$ , *ACS. Appl. Mater. Interfaces*, 2021, **13**, 37331–37338.
6. Z. H. Shi, M. Yang, W. D. Yao, W. L. Liu and S. P. Guo,  $SnPQ_3$  ( $Q = S, Se, S/Se$ ): A Series of Lone-Pair Cationic Chalcogenophosphates Exhibiting Balanced NLO Activity Originating from  $SnQ_8$  Units, *Inorg. Chem.*, 2021, **60**, 14390–14398.
7. M. L. Zhou, L. Kang, J. Y. Yao, Z. S. Lin, Y. C. Wu and C. T. Chen, Midinfrared Nonlinear Optical Thiophosphates from  $LiZnPS_4$  to  $AgZnPS_4$ : A Combined Experimental and Theoretical Study, *Inorg. Chem.*, 2016, **55**, 3724–3726.
8. Z. Li, S. Z. Zhang, Z. W. Huang, L. D. Zhao, E. Uykur, W. H. Xing, Z. S. Lin, J. Y. Yao and Y. C. Wu, Molecular Construction from  $AgGaS_2$  to  $CuZnPS_4$ : Defect-Induced Second Harmonic Generation Enhancement and Cosubstitution-Driven Band Gap Enlargement, *Chem. Mater.*, 2020, **32**, 3288–3296.

9. B. J. Song, Z. J. Ma, B. X. Li, X. T. Wu, H. Lin and Q. L. Zhu, Structural Modulation from  $\text{Cu}_3\text{PS}_4$  to  $\text{Cu}_5\text{Zn}_{0.5}\text{P}_2\text{S}_8$ : Single-Site Aliovalent-Substitution-Driven Second-Harmonic-Generation Enhancement, *Inorg. Chem.*, 2021, **60**, 4357–4361.
10. W. H. Xing, N. Z. Wang, C. L. Tang, C. X. Li, Z. S. Lin, J. Y. Yao, W. L. Yin and B. Kang, From  $\text{AgGaS}_2$  to  $\text{AgHgPS}_4$ : Vacancy Defects and Highly Distorted  $\text{HgS}_4$  Tetrahedra Double-Induced Remarkable Second-Harmonic Generation Response, *J. Mater. Chem. C*, 2021, **9**, 1062–1068.
11. M. Y. Li, Z. Ma, B. Li, X. T. Wu, H. Lin and Q. L. Zhu,  $\text{HgCuPS}_4$ : An Exceptional Infrared Nonlinear Optical Material with Defect Diamond-like Structure, *Chem. Mater.*, 2020, **32**, 4331–4339.
12. W. H. Xing, C. L. Tang, P. F. Gong, J. Y. Wu, Z. S. Lin, J. Y. Yao, W. L. Yin and B. Kang, Investigation into Structural Variation from 3D to 1D and Strong Second Harmonic Generation of the  $\text{AHgPS}_4$  ( $\text{A}^+ = \text{Na}^+, \text{K}^+, \text{Rb}^+, \text{Cs}^+$ ) Family, *Inorg. Chem.*, 2021, **60**, 18370–18378.
13. Y. Wang, Y. Q. Fang, Y. Z. Cao and F. Q. Huang, Two Nonlinear Optical Thiophosphates  $\text{Cu}_5\text{Hg}_{0.5}\text{P}_2\text{S}_8$  and  $\text{AgHg}_3\text{PS}_6$  Activated by Their Tetrahedra-Stacking Architecture, *Inorg. Chem.*, 2022, **61**, 1620–1626.
14. Y. H. Fan, X. M. Jiang, B. W. Liu, S. F. Li, W. H. Guo, H. Y. Zeng, G. C. Guo and J. S. Huang, Phase Transition and Second Harmonic Generation in Thiophosphates  $\text{Ag}_2\text{Cd}(\text{P}_2\text{S}_6)$  and  $\text{AgCd}_3(\text{PS}_4)\text{S}_2$  Containing Two Second-Order Jahn–Teller Distorted Cations, *Inorg. Chem.*, 2017, **56**, 114–124.
15. Z. Li, S. Z. Zhang, W. H. Xing, Y. W. Guo, C. X. Li, Z. S. Lin, J. Y. Yao and Y. C. Wu, Mixed-Metal Thiophosphate  $\text{CuCd}_3\text{PS}_6$ : An Infrared Nonlinear Optical Material Activated by Its Three-in-One Tetrahedra-Stacking Architecture, *J. Mater. Chem. C*, 2020, **8**, 5020–5024.
16. J. H. Feng, C. L. Hu, B. X. Li and J. G. Mao,  $\text{LiGa}_2\text{PS}_6$  and  $\text{LiCd}_3\text{PS}_6$ : Molecular Designs of Two New Mid-Infrared Nonlinear Optical Materials, *Chem. Mater.*, 2018, **30**, 3901–3908.

17. J. H. Feng, C. L. Hu, X. Xu, B. X. Li, M. J. Zhang and J. G. Mao, AgGa<sub>2</sub>PS<sub>6</sub>: A New Mid-Infrared Nonlinear Optical Material with a High Laser Damage Threshold and a Large Second Harmonic Generation Response, *Chem. - Eur. J.*, 2017, **23**, 10978–10982.
18. V. Nguyen, B. H. Ji, K. Wu, B. B. Zhang and J. Wang, Unprecedented Mid-Infrared Nonlinear Optical Materials Achieved by Crystal Structure Engineering, a Case Study of (KX)P<sub>2</sub>S<sub>6</sub> (X = Sb, Bi, Ba), *Chem. Sci.*, 2022, **13**, 2640–2648.
19. M. M. Chen, S. H. Zhou, W. B. Wei, M. Y. Ran, B. X. Li, X. T. Wu, H. Lin and Q. L. Zhu, RbBiP<sub>2</sub>S<sub>6</sub>: A Promising IR Nonlinear Optical Material with a Giant Second-Harmonic Generation Response Designed by Aliovalent Substitution, *ACS Mater. Lett.*, 2022, **4**, 1264–1269
